# Supplementary material for: 1-Benzyl-3-cetyl-2-methylimidazolium Iodide (NH125) Is a Broad-Spectrum Inhibitor of Virus Entry with Lysosomotropic Features
Source: Viruses. 2018 Jun 5;10(6):306. doi: 10.3390/v10060306 (PMC6024324; doi:10.3390/v10060306)
Supplement: Supplementary file 1 [file viruses-10-00306-s001.pdf]

**Table S1.** List of kinase inhibitors that have been screened for antiviral activity against VSV\*ΔG(FLuc).

| Compound          | Target kinase     | Inhibition of luciferase (%) <sup>1</sup> | Compound                  | Target kinase | Inhibition of luciferase (%) <sup>1</sup> |
|-------------------|-------------------|-------------------------------------------|---------------------------|---------------|-------------------------------------------|
| AG 490            | EGFR              | 45.0                                      | 10-DEBC                   | PKB           | 70.2                                      |
| ML 9              | MLCK              | 33.1                                      | TPCA-1                    | IKK           | 38.2                                      |
| NH125             | CaM<br>Kinase III | 97.8                                      | SB 218078                 | Chk1          | 13.2                                      |
| Fasudil           | ROCK              | 20.3                                      | TCS 359                   | FLT3          | 6.8                                       |
| GF 109203X        | PKC               | 80.9                                      | PD 198306                 | MEK           | 44.5                                      |
| Genistein         | EGFR              | 39.8                                      | Ryuvidine                 | cdk           | 99.1                                      |
| LY 294002         | PI3K              | 44.5                                      | IMD 0354                  | IKK           | 93.6                                      |
| U0126             | MEK               | 52.0                                      | CGK 733                   | ATR/ATM       | 82.9                                      |
| PD 98059          | MEK               | 41.5                                      | PHA 665752                | cMET          | 90.5                                      |
| Y-27632           | ROCK              | 15.2                                      | PD 407824                 | Chk1          | 31.9                                      |
| SB 202190         | p38 MAPK          | 26.3                                      | LY 364947                 | TGFbR1        | 4.8                                       |
| Olomoucine        | cdk               | 29.4                                      | CGP 57380                 | Mnk1          | 50.0                                      |
| LFM-A13           | BTK               | 15.1                                      | PQ 401                    | IGF-1R        | 33.1                                      |
| ZM 336372         | Raf               | 16.9                                      | PI 828                    | PI3K          | 12.7                                      |
| ZM 449829         | JAK3              | 29.1                                      | NU 7026                   | DNA-PK        | 29.8                                      |
| ZM 39923          | JAK3              | 16.5                                      | D 4476                    | CK1           | 0                                         |
| GW 5074           | Raf               | 0.5                                       | EO 1428                   | p38 MAPK      | 45.4                                      |
| PP 1              | Src               | 31.2                                      | H 89                      | PKA           | 45.0                                      |
| SB 203580         | p38 MAPK          | 10.8                                      | FPA 124                   | PKB           | 11.3                                      |
| (-)-Terreic acid  | BTK               | 33.0                                      | GW 843682X                | PLK           | 26.7                                      |
| PP 2              | Src               | 16.2                                      | Iressa                    | EGFR          | 62.4                                      |
| SU 4312           | VEGFR             | 51.3                                      | SU 5416                   | VEGFR         | 21.4                                      |
| SP 600125         | JNK               | 75.4                                      | 1-Naphthyl PP1            | Src           | 4.5                                       |
| Purvalanol A      | cdk               | 51.8                                      | GSK 650394                | SGK           | 7.1                                       |
| Purvalanol B      | cdk               | 1.5                                       | BIO                       | GSK-3         | 81.7                                      |
| KU 55933          | ATM               | 53.1                                      | SD 208                    | TGFbR1        | 25.5                                      |
| SB 431542         | TGFbR1            | 23.5                                      | Compound 401              | DNA-PK        | 13.6                                      |
| SB 216763         | GSK-3             | 36.9                                      | BI 78D3                   | JNK           | 13.0                                      |
| SB 415286         | GSK-3             | 15.1                                      | SC 514                    | IKK           | 43.0                                      |
| Arctigenin        | MEK               | 42.6                                      | Hexabromocyclo-<br>hexane | JAK2          | 0                                         |
| NSC 693868        | cdk               | 0                                         | HA 1100                   | ROCK          | 0                                         |
| SB 239063         | p38 MAPK          | 23.8                                      | BIBX 1382                 | EGFR          | 0                                         |
| SL 327            | MEK               | 27.0                                      | CGP 53353                 | PKC           | 9.9                                       |
| Ro 31-8220        | Broad             | 83.6                                      | Arcyriaflavin A           | cdk           | 24.3                                      |
| Aminopurvalanol A | cdk               | 51.4                                      | ZM 447439                 | Aurora        | 16.8                                      |

|            |      |      |           |       |      |
|------------|------|------|-----------|-------|------|
| API-2      | PKB  | 48.3 | ER 27319  | Syk   | 81.0 |
| GW 441756  | TrkA | 18.8 | ZM 323881 | VEGFR | 27.8 |
| GW 583340  | EGFR | 29.1 | ZM 306416 | VEGFR | 30.4 |
| Ro 08-2750 | TrkA | 33.7 | IKK 16    | IKK   | 98.0 |
| TBB        | CK2  | 0    | Ki 8751   | VEGFR | 6.2  |

<sup>1</sup> Vero cells were treated for 2 hours with the inhibitors (10  $\mu$ M) and subsequently infected with VSV\* $\Delta$ G(FLuc) using an m.o.i. of 0.5 ffu/cell. The cells were maintained in the presence of inhibitor and lysed 6 hours post infection. The percentage luciferase activity relative to DMSO-treated cells is shown (mean value of two 2 independent experiments). Inhibitors suppressing virus-driven luciferase expression by more than 95% are printed in red letters.

(a)

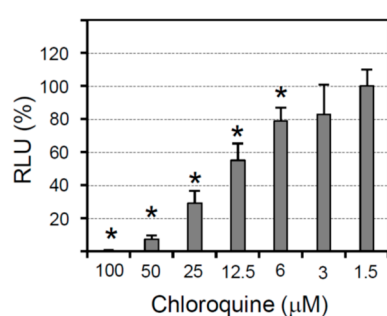

(b)

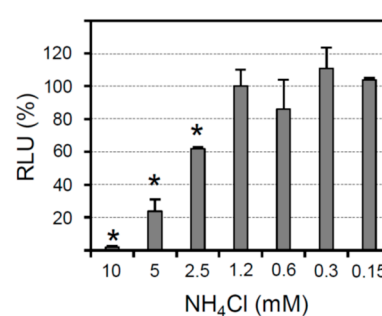

**Figure S1.** Inhibition of VSV entry by lysosomotropic compounds. BHK-21 cells were treated for 1 hour with either chloroquine (a) or NH<sub>4</sub>Cl (b) using the indicated concentrations. The cells were inoculated in the presence of the drugs for 1 hour with VSV\* $\Delta$ G(sNLuc) using an m.o.i. of 0.5 ffu/cell. The cells were subsequently washed and incubated in the presence of monoclonal antibody I1 to prevent virus entry at later time. Secreted Nano luciferase activity was determined in the cell culture supernatant 6 hours p.i. The percentage RLUs relative to mock-treated cells were calculated. Mean titers and standard deviations of 6 parallel experiments are shown. The asterisks indicate virus entry inhibition at levels significantly different from mock-treated cells.

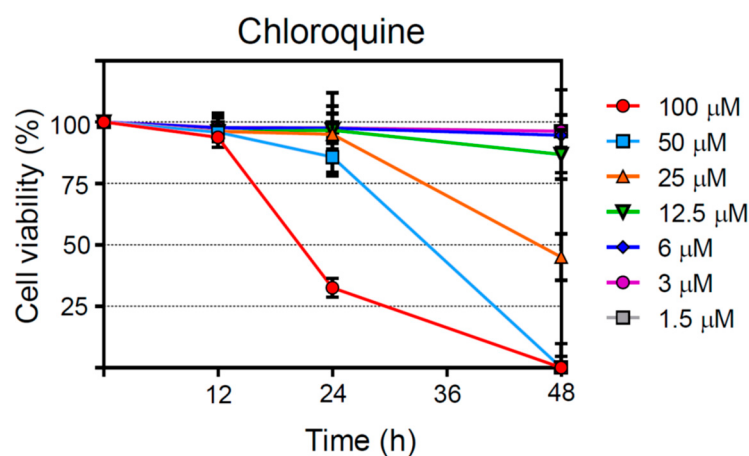

**Figure S2.** Effect of chloroquine on BHK-21 cell viability. BHK-21 cells were incubated with chloroquine using the indicated concentrations. The proportion of dead cells was determined at the indicated times by determining the activity of dead cell protease released from dying cells and in total cell lysates. Mean values and standard deviations of 4 parallel experiments are shown.
